# Supplementary material for: Novel Risk Associations between microRNA Polymorphisms and Gastric Cancer in a Chilean Population
Source: MDPI journal article supplement (doi:10.3390/ijms23010467), 2021-12-31
Supplement: s1 [file s1]

**Table S2.** Association analysis of rs4938723 T>C (miR-34b/c), rs895819 T>C (miR-27a), rs3746444 A>G (miR-499), rs2043556 T>C (miR-605) and rs6505162 A>C (miR-423) with gastric cancer by allele model.

| rsID<br>(Gene name)            | Tested<br>allele | R <sup>2</sup> | Allelic<br>frequency<br>(cases/controls) | AMR  | OR <sup>1</sup> | p-<br>value <sup>1</sup> | OR <sup>2</sup> | p-<br>value <sup>2</sup> | OR <sup>3</sup> | p-<br>value <sup>3</sup> |
|--------------------------------|------------------|----------------|------------------------------------------|------|-----------------|--------------------------|-----------------|--------------------------|-----------------|--------------------------|
| All Gastric Cancer cases       |                  |                |                                          |      |                 |                          |                 |                          |                 |                          |
| rs4938723 T>C<br>(miR-34b/c)   | C                |                | 0.25/0.26                                | 0.22 | 0.96            | 0.74                     | 0.94            | 0.69                     | 0.94            | 0.63                     |
| rs895819 T>C<br>(miR-27a)      | C                |                | 0.20/0.23                                | 0.38 | 0.78            | 0.13                     | 0.77            | 0.15                     | 0.79            | 0.15                     |
| rs3746444 A>G<br>(miR-499)     | G                |                | 0.15/0.15                                | 0.13 | 1.04            | 0.80                     | 1.03            | 0.89                     | 1.04            | 0.80                     |
| rs2043556 T>C<br>(miR-605)     | C                |                | 0.29/0.30                                | 0.37 | 0.95            | 0.75                     | 1.00            | 0.98                     | 0.97            | 0.83                     |
| rs6505162 A>C<br>(miR-423)     | C                |                | 0.56/0.57                                | 0.54 | 0.99            | 0.94                     | 1.02            | 0.86                     | 0.98            | 0.83                     |
| Intestinal-type Gastric Cancer |                  |                |                                          |      |                 |                          |                 |                          |                 |                          |
| rs4938723 T>C<br>(miR-34b/c)   | C                |                | 0.24/0.26                                | 0.22 | 0.95            | 0.76                     | 0.90            | 0.56                     | 0.92            | 0.61                     |
| rs895819 T>C<br>(miR-27a)      | C                |                | 0.20/0.23                                | 0.38 | 0.81            | 0.30                     | 0.77            | 0.24                     | 0.81            | 0.30                     |
| rs3746444 A>G<br>(miR-499)     | G                |                | 0.14/0.15                                | 0.13 | 0.94            | 0.76                     | 0.85            | 0.49                     | 0.94            | 0.76                     |
| rs2043556 T>C<br>(miR-605)     | C                |                | 0.28/0.30                                | 0.37 | 0.88            | 0.48                     | 0.85            | 0.44                     | 0.88            | 0.48                     |
| rs6505162 A>C<br>(miR-423)     | C                |                | 0.58/0.57                                | 0.54 | 1.07            | 0.62                     | 1.10            | 0.56                     | 1.07            | 0.62                     |
| Diffuse-type Gastric Cancer    |                  |                |                                          |      |                 |                          |                 |                          |                 |                          |
| rs4938723 T>C<br>(miR-34b/c)   | C                |                | 0.26/0.26                                | 0.22 | 0.99            | 0.97                     | 1.01            | 0.98                     | 1.00            | 1.00                     |
| rs895819 T>C<br>(miR-27a)      | C                |                | 0.18/0.23                                | 0.38 | 0.67            | 0.09                     | 0.70            | 0.14                     | 0.69            | 0.10                     |
| rs3746444 A>G<br>(miR-499)     | G                |                | 0.15/0.15                                | 0.13 | 1.05            | 0.84                     | 1.14            | 0.60                     | 1.05            | 0.83                     |
| rs2043556 T>C<br>(miR-605)     | C                |                | 0.30/0.30                                | 0.37 | 0.97            | 0.87                     | 0.96            | 0.87                     | 1.00            | 0.99                     |
| rs6505162 A>C<br>(miR-423)     | C                |                | 0.52/0.57                                | 0.54 | 0.83            | 0.22                     | 0.84            | 0.31                     | 0.83            | 0.23                     |
| TNM I-II                       |                  |                |                                          |      |                 |                          |                 |                          |                 |                          |
| rs4938723 T>C<br>(miR-34b/c)   | C                |                | 0.29/0.26                                | 0.22 | 1.22            | 0.27                     | 1.16            | 0.44                     | 1.20            | 0.31                     |
| rs895819 T>C<br>(miR-27a)      | C                |                | 0.21/0.23                                | 0.38 | 0.84            | 0.46                     | 0.86            | 0.52                     | 0.85            | 0.46                     |
| rs3746444 A>G<br>(miR-499)     | G                |                | 0.13/0.15                                | 0.13 | 0.82            | 0.43                     | 0.79            | 0.37                     | 0.83            | 0.46                     |
| rs2043556 T>C<br>(miR-605)     | C                |                | 0.32/0.30                                | 0.37 | 1.18            | 0.42                     | 1.17            | 0.48                     | 1.19            | 0.38                     |
| rs6505162 A>C                  | C                |                | 0.58/0.57                                | 0.54 | 1.09            | 0.61                     | 1.09            | 0.64                     | 1.05            | 0.76                     |

|                                          |   |  |           |      |      |      |      |      |      |      |
|------------------------------------------|---|--|-----------|------|------|------|------|------|------|------|
| (miR-423)                                |   |  |           |      |      |      |      |      |      |      |
| TNM III-IV                               |   |  |           |      |      |      |      |      |      |      |
| rs4938723 T>C<br>(miR-34b/c)             | C |  | 0.23/0.26 | 0.22 | 0.88 | 0.42 | 0.86 | 0.40 | 0.86 | 0.33 |
| rs895819 T>C<br>(miR-27a)                | C |  | 0.20/0.23 | 0.38 | 0.80 | 0.27 | 0.80 | 0.32 | 0.82 | 0.31 |
| rs3746444 A>G<br>(miR-499)               | G |  | 0.16/0.15 | 0.13 | 1.14 | 0.52 | 1.26 | 0.32 | 1.14 | 0.53 |
| rs2043556 T>C<br>(miR-605)               | C |  | 0.29/0.30 | 0.37 | 0.95 | 0.76 | 0.99 | 0.95 | 0.95 | 0.80 |
| rs6505162 A>C<br>(miR-423)               | C |  | 0.56/0.57 | 0.54 | 0.97 | 0.81 | 0.97 | 0.84 | 0.96 | 0.74 |
| <i>H.pylori</i> infected subjects        |   |  |           |      |      |      |      |      |      |      |
| rs4938723 T>C<br>(miR-34b/c)             | C |  | 0.25/0.28 | 0.22 | 1.05 | 0.85 | 1.17 | 0.58 | 0.86 | 0.51 |
| rs895819 T>C<br>(miR-27a)                | C |  | 0.16/0.24 | 0.38 | 0.56 | 0.08 | 0.61 | 0.17 | 0.53 | 0.04 |
| rs3746444 A>G<br>(miR-499)               | G |  | 0.14/0.17 | 0.13 | 0.74 | 0.35 | 0.85 | 0.68 | 0.80 | 0.47 |
| rs2043556 T>C<br>(miR-605)               | C |  | 0.28/0.25 | 0.37 | 1.18 | 0.56 | 1.49 | 0.22 | 1.22 | 0.46 |
| rs6505162 A>C<br>(miR-423)               | C |  | 0.55/0.57 | 0.54 | 0.94 | 0.76 | 1.00 | 1.00 | 0.92 | 0.69 |
| <i>H.pylori</i> cagPAI-positive subjects |   |  |           |      |      |      |      |      |      |      |
| rs4938723 T>C<br>(miR-34b/c)             | C |  | 0.25/0.23 | 0.22 | 1.24 | 0.49 | 1.59 | 0.19 | 1.10 | 0.75 |
| rs895819 T>C<br>(miR-27a)                | C |  | 0.16/0.20 | 0.38 | 0.64 | 0.31 | 0.77 | 0.60 | 0.66 | 0.31 |
| rs3746444 A>G<br>(miR-499)               | G |  | 0.15/0.17 | 0.13 | 0.77 | 0.52 | 0.79 | 0.61 | 0.86 | 0.70 |
| rs2043556 T>C<br>(miR-605)               | C |  | 0.30/0.28 | 0.37 | 1.25 | 0.52 | 1.60 | 0.24 | 1.12 | 0.73 |
| rs6505162 A>C<br>(miR-423)               | C |  | 0.56/0.61 | 0.54 | 0.78 | 0.35 | 0.88 | 0.66 | 0.84 | 0.48 |

1 Adjusted for sex, principal component (PC)1 and PC2. 2 Adjusted for age, sex, principal component (PC)1 and PC2. 3 Crude. AMR: Allele frequency in Ad Mixed Americans in 1000 genomes project, R<sup>2</sup>: R-square (a metric of quality of imputation), OR: Odds ratio, p-value< 0.01 is considered significant.
